# Supplementary material for: Gate controllable fully spin-polarized and pure spin current in γ-graphyne nanoribbons
Source: Royal Society of Chemistry journal article supplement (doi:10.1039/d4tc03876b), 2024-11-05
Supplement: d4tc03876b1.pdf [file d4tc03876b1.pdf]

## Supplementary Information: Journal of Materials Chemistry C: Gate controllable fully spin-polarized and pure spin current in $\gamma$ -graphyne nanoribbon

Liwen Zhang,<sup>a,\*</sup> Yanjing Hao,<sup>a</sup> Yaqing Yang,<sup>b,d</sup> Jun Chen,<sup>c,d</sup> Lei Zhang,<sup>b,d,†</sup>

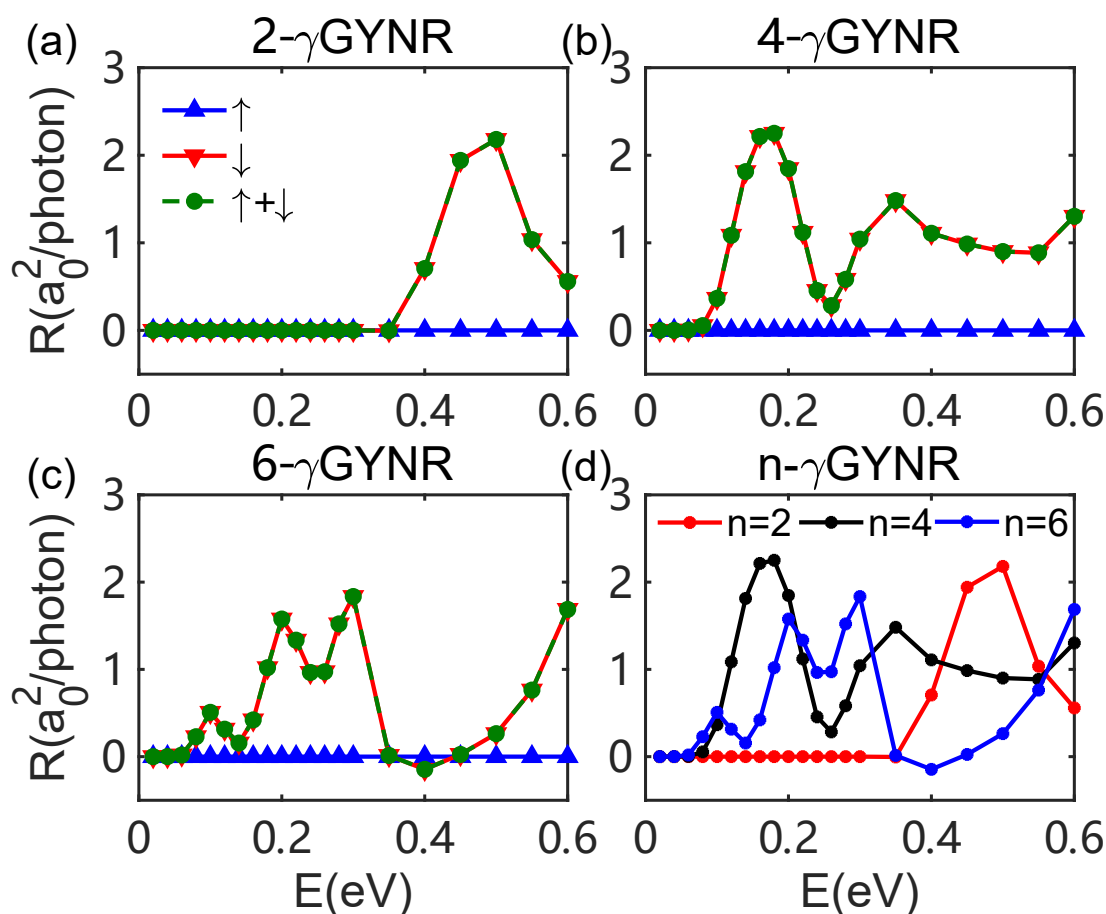

**Figure S1** The spin-dependent photoresponse versus the photon energy generated by LPGE ( $\theta = 45^\circ$ ) in the PP configuration. (a)  $n=2$ ; (b)  $n=4$ ; (c)  $n=6$ ; (d) The spin down photoresponse versus the photon energy under different ribbon widths ( $n$ ). Here, the gate voltage  $V_g = 8V$ .

<sup>a</sup>School of Physics and Information Engineering, Shanxi Normal University, Taiyuan 030031, China

<sup>b</sup>State Key Laboratory of Quantum Optics and Quantum Optics Devices, Institute of Laser Spectroscopy, Shanxi University, Taiyuan 030006, China

<sup>c</sup>State Key Laboratory of Quantum Optics and Quantum Optics Devices, Institute of Theoretical Physics, Shanxi University, Taiyuan 030006, China

<sup>d</sup>Collaborative Innovation Center of Extreme Optics, Shanxi University, Taiyuan 030006, China

\*lwzhang@sxnu.edu.cn

†zhanglei@sxu.edu.cn
